# Supplementary material for: Diclofenac Loaded Biodegradable Nanoparticles as Antitumoral and Antiangiogenic Therapy
Source: MDPI journal article supplement (doi:10.3390/pharmaceutics15010102), 2022-12-28
Supplement: s1 [file s1]

# Supplementary Materials: Diclofenac loaded biodegradable nanoparticles as antitumoral and antiangiogenic therapy

Gerard Esteruelas, Eliana B. Souto, Marta Espina, María Luisa García, Marta Świtalska, Joanna Wietrzyk, Anna Gliszczyńska and Elena Sánchez-López

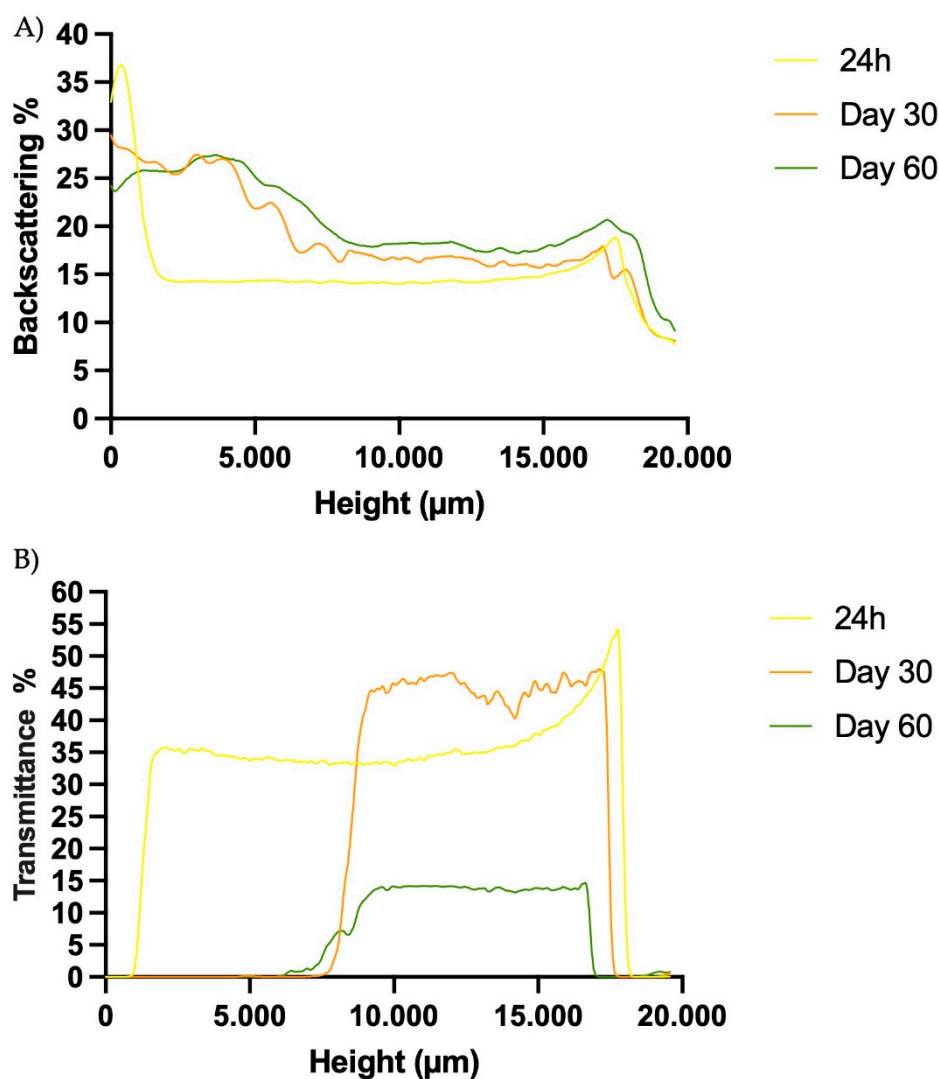

**Figure S1.** Stability studies of DCF NPs at 25 °C. (A) Tubiscan backscattering profile, (B) Turbiscan Transmittance profile.

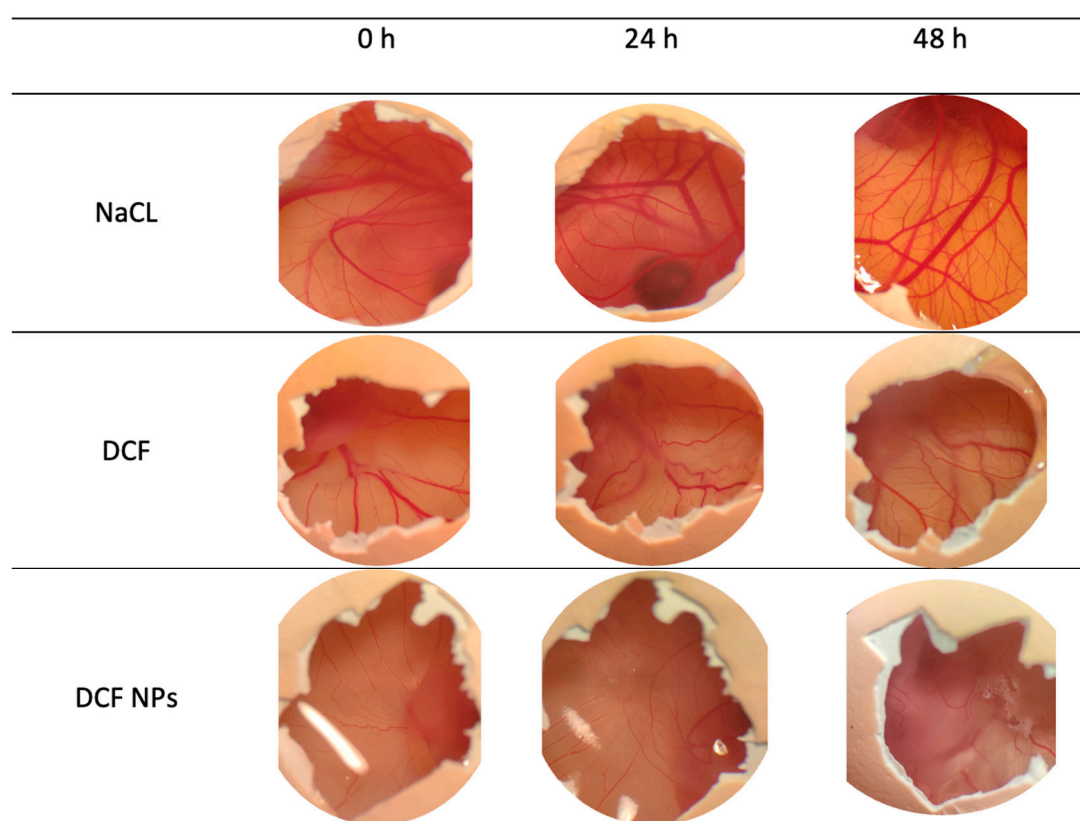

**Figure S2.** Collection of CAM images at 0, 24 h and 48 h after being exposed to NaCL, DCF or DCF NPs.
